# Supplementary material for: Electrospray interfacial polymerization for a loose NF membrane: super-selective dye separation in saline dye wastewater treatment
Source: Royal Society of Chemistry journal article supplement (doi:10.1039/d1en00397f), 2021-01-01
Supplement: d1en00397f1.pdf [file d1en00397f1.pdf]

## Supplementary information

# Electrospray interfacial polymerization for a loose NF membrane: Super-selective dye separation in saline dye wastewater treatment

Yesol Kang<sup>a</sup>, Jaewon Jang<sup>a</sup>, Yunho Lee<sup>a</sup>, and In S. Kim<sup>a,\*</sup>

<sup>a</sup>School of Earth Sciences and Environmental Engineering (SESE), Gwangju Institute of  
Science and Technology (GIST), 123 Cheomdangwagi-ro, Buk-gu, Gwangju 61005,  
Republic of Korea

\* Corresponding author: Tel: +82-62-715-2436, e-mail: [iskim@gist.ac.kr](mailto:iskim@gist.ac.kr)

**Table S1.** Characteristics of the dye molecules used in this study

| Dye name      | Molecular formula                                                                             | Molecular structure                                                                 | Molecular weight (g mol <sup>-1</sup> ) | Nature   | UV adsorption (nm) |
|---------------|-----------------------------------------------------------------------------------------------|-------------------------------------------------------------------------------------|-----------------------------------------|----------|--------------------|
| Evans blue    | C <sub>34</sub> H <sub>24</sub> N <sub>6</sub> Na <sub>4</sub> O <sub>14</sub> S <sub>4</sub> | 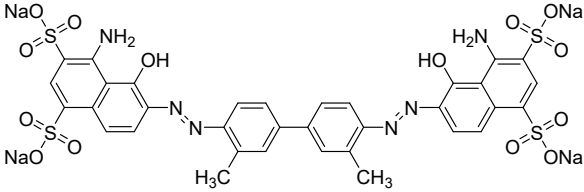  | 960.8                                   | Negative | 606                |
| Congo red     | C <sub>32</sub> H <sub>22</sub> N <sub>6</sub> Na <sub>2</sub> O <sub>6</sub> S <sub>2</sub>  |   | 696.7                                   | Negative | 495                |
| Methyl orange | C <sub>14</sub> H <sub>14</sub> N <sub>3</sub> NaO <sub>3</sub> S                             |  | 327.3                                   | Negative | 461                |

**Table S2.** C 1s, O 1s, and S 2p core-level XPS spectra of GO, and SGO.

|             | GO  | SGO |
|-------------|-----|-----|
| <b>C 1s</b> |     |     |
| <b>O 1s</b> |     |     |
| <b>S 2p</b> | N/A |     |

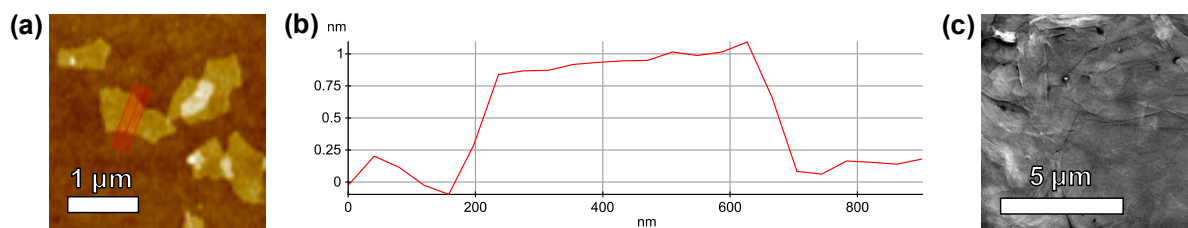

**Fig. S1.** (a) A tapping mode AFM image of SGO sheets and (b) the height profile of the AFM image. (c) The SEM image of SGO sheet at a magnification of  $\times 10k$ .

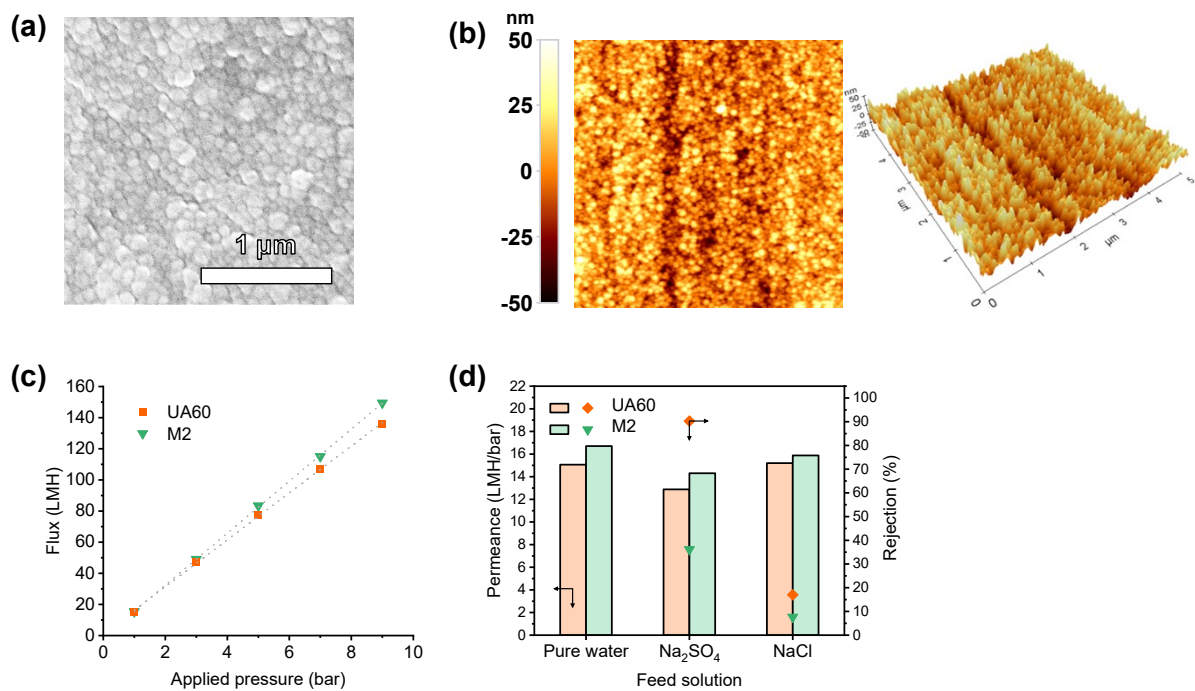

**Fig. S2.** (a) SEM surface images, (b) AFM surface scanning images of UA60 membrane, (c) pure water flux depending on the applied pressure (UA60 to 15.1 LMH  $\text{bar}^{-1}$ ), and (d) permeance and salt rejection comparison of UA60 and M2 under operating pressure at 5 bar.

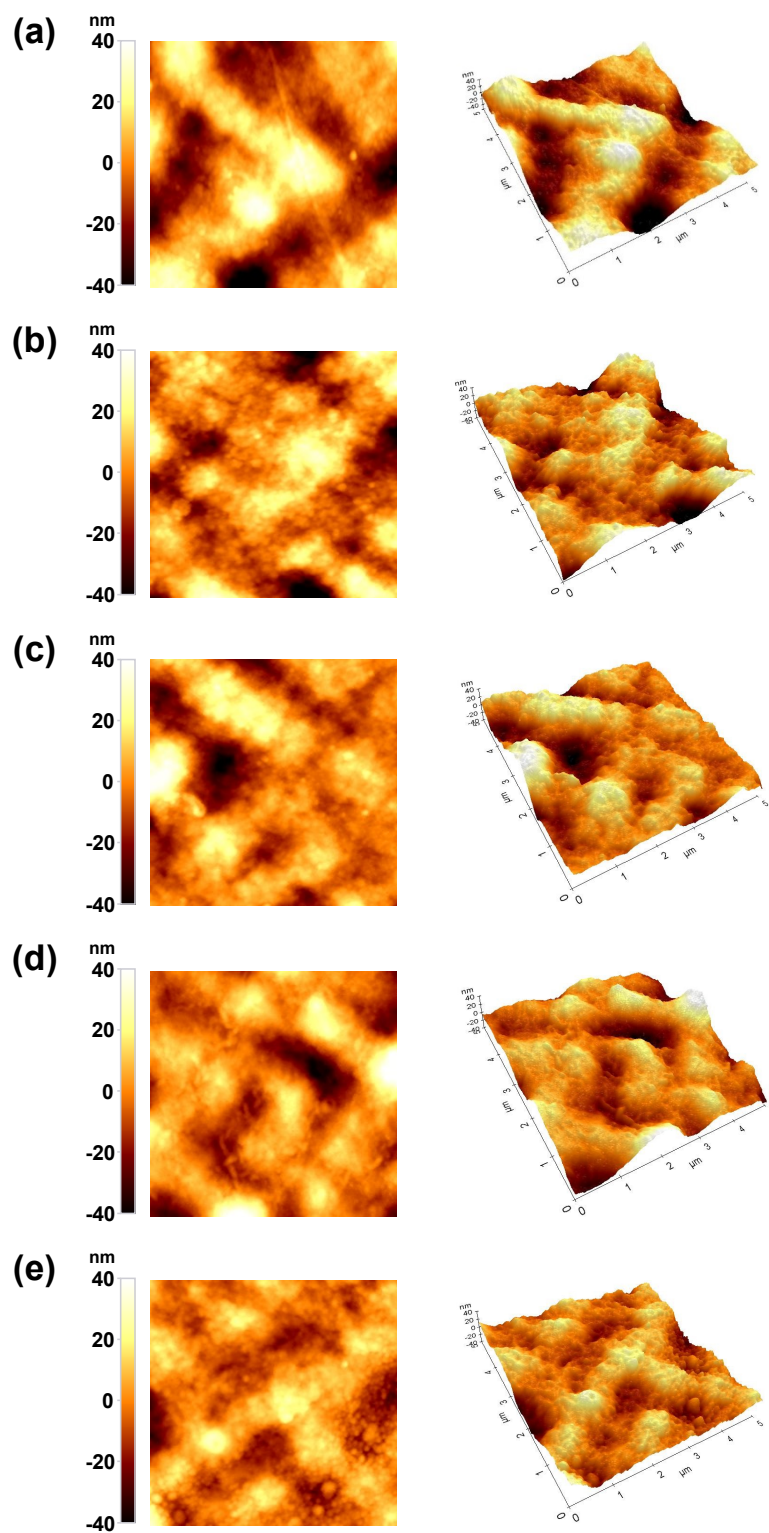

**Fig. S3.** Surface AFM images of SGO contained membranes: (a) M0, (b) M1, (c) M1.5, (d) M2, and (e) M3.

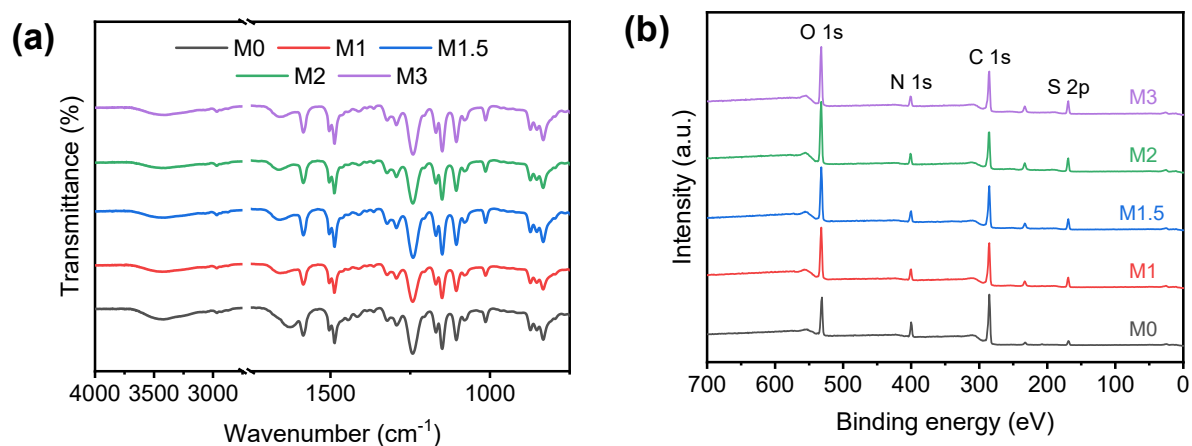

**Fig. S4.** (a) ATR-FTIR and (b) XPS spectra of the prepared membranes.

**Table S3.** The atomic percentage of element (%) obtained from XPS of membranes

| Membrane    | Elemental ratio (%) |      |      |      |
|-------------|---------------------|------|------|------|
|             | C 1s                | N 1s | O 1s | S 2p |
| <b>M0</b>   | 66.4                | 10.9 | 20.1 | 2.6  |
| <b>M1</b>   | 58.8                | 8.4  | 27.2 | 5.6  |
| <b>M1.5</b> | 56.1                | 8.9  | 28.8 | 6.2  |
| <b>M2</b>   | 52.1                | 7.9  | 32.2 | 7.8  |
| <b>M3</b>   | 54.7                | 7.7  | 30.3 | 7.3  |

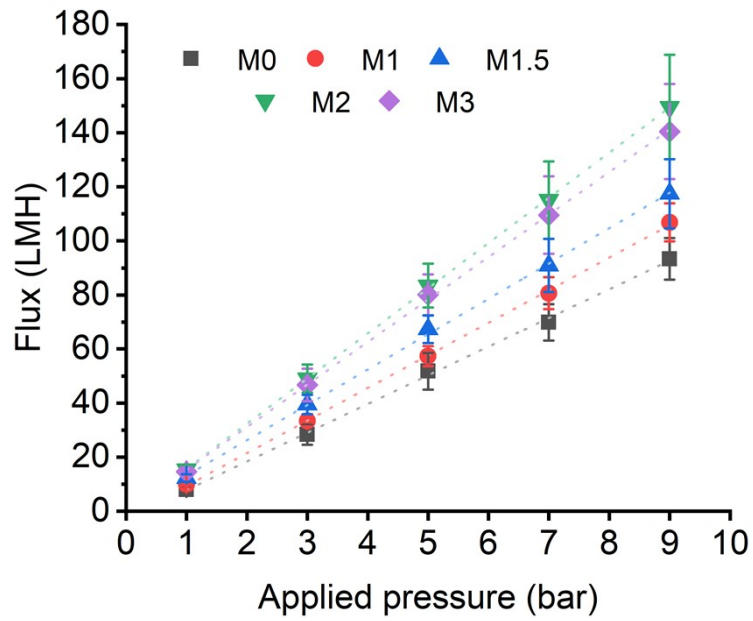

**Fig. S5.** Membrane flux differences depending on the applied pressure and membrane; PWP values of membranes are  $11.0 \pm 0.8$ ,  $12.1 \pm 0.9$ ,  $13.1 \pm 1.5$ ,  $16.7 \pm 2.2$ , and  $15.7 \pm 2.0$  LMH  $\text{bar}^{-1}$ , corresponding to M0, M1, M1.5, M2, and M3.



**Table S4.** Comparison of the permeance, dye rejection, and salt rejection.

| Membrane                                        | Permeance<br>(LMH bar <sup>-1</sup> ) | Dye                            | Dye rejection<br>(%) | Salt                            | Salt<br>rejection<br>(%) | Ref.         |
|-------------------------------------------------|---------------------------------------|--------------------------------|----------------------|---------------------------------|--------------------------|--------------|
| GO-PCS                                          | 13.2                                  | Direct<br>black 38             | 99.7                 | NaCl                            | 56.8                     | 1            |
|                                                 |                                       |                                |                      | Na <sub>2</sub> SO <sub>4</sub> | 87.8                     |              |
| (PEI-modified<br>GO)/PAA/PV<br>A/GA             | 0.84                                  | Congo<br>red<br>Methyl<br>blue | 99.5                 | NaCl                            | 37.8                     | 2            |
|                                                 |                                       |                                | 99.3                 |                                 |                          |              |
| GOQDs-1                                         | 11.7                                  | Congo<br>red<br>Methyl<br>blue | 99.8                 | NaCl                            | 17.2                     | 3            |
|                                                 |                                       |                                | 97.6                 |                                 |                          |              |
| GO(120) NFM                                     | 11.1                                  | Methyl<br>blue                 | 98.88                | NaCl                            | 27.86                    | 4            |
| GO@PAN                                          | 5                                     | Congo<br>red                   | 99.9                 | NaCl                            | 9.8                      | 5            |
|                                                 |                                       |                                |                      | Na <sub>2</sub> SO <sub>4</sub> | 56.7                     |              |
| PDA-rGOC2                                       | 16.8                                  | Congo<br>red                   | 99.6                 | NaCl                            | 43.2                     | 6            |
| PAN/GO                                          | 5.5                                   | Acid red<br>18                 | 99.8                 | NaCl                            | 10.9                     | 7            |
|                                                 |                                       | Methyl<br>blue                 | 100                  | MgCl <sub>2</sub>               | 11.3                     |              |
| PES/Metformin/GO/Fe <sub>3</sub> O <sub>4</sub> | 9.02                                  | Direct<br>red 16               | 99                   | NaCl                            | 15                       | 8            |
| HNTs-<br>poly(NASS)/P<br>ES                     | 10.8                                  | Reactive<br>black 5            | 85.5                 | NaCl                            | 6.9                      | 9            |
|                                                 |                                       |                                |                      | Na <sub>2</sub> SO <sub>4</sub> | 12                       |              |
| Polypiperazine<br>-amide NF                     | 7.0                                   | Reactive<br>black 5            | 99.3                 | NaCl                            | 66.7                     | 10           |
|                                                 |                                       |                                |                      | Na <sub>2</sub> SO <sub>4</sub> | 98.9                     |              |
| UA60                                            | 15.1                                  | EB                             | 99.8                 | NaCl                            | 17.0                     |              |
|                                                 |                                       | CR                             | 99.5                 | Na <sub>2</sub> SO <sub>4</sub> | 90.3                     |              |
| M0                                              | 11.0                                  | EB                             | 99.5                 | NaCl                            | 24.5                     | This<br>work |
|                                                 |                                       | CR                             | 99.9                 | Na <sub>2</sub> SO <sub>4</sub> | 52.8                     |              |
| M2                                              | 16.7                                  | EB                             | 99.6                 | NaCl                            | 7.7                      |              |
|                                                 |                                       | CR                             | 99.8                 | Na <sub>2</sub> SO <sub>4</sub> | 36.1                     |              |

**References**

- 1 Y. Song, Y. Sun, M. Chen, P. Huang, T. Li, X. Zhang and K. Jiang, Efficient removal and fouling-resistant of anionic dyes by nanofiltration membrane with phosphorylated chitosan modified graphene oxide nanosheets incorporated selective layer, *J. Water Process Eng.*, 2020, **34**, 101086.
- 2 N. Wang, S. Ji, G. Zhang, J. Li and L. Wang, Self-assembly of graphene oxide and polyelectrolyte complex nanohybrid membranes for nanofiltration and pervaporation, *Chem. Eng. J.*, 2012, **213**, 318–329.
- 3 C. Zhang, K. Wei, W. Zhang, Y. Bai, Y. Sun and J. Gu, Graphene Oxide Quantum Dots Incorporated into a Thin Film Nanocomposite Membrane with High Flux and Antifouling Properties for Low-Pressure Nanofiltration, *ACS Appl. Mater. Interfaces*, 2017, **9**, 11082–11094.
- 4 L. Chen, J. H. Moon, X. Ma, L. Zhang, Q. Chen, L. Chen, R. Peng, P. Si, J. Feng, Y. Li, J. Lou and L. Ci, High performance graphene oxide nanofiltration membrane prepared by electrospraying for wastewater purification, *Carbon*, 2018, **130**, 487–494.
- 5 J. Wang, P. Zhang, B. Liang, Y. Liu, T. Xu, L. Wang, B. Cao and K. Pan, Graphene Oxide as an Effective Barrier on a Porous Nanofibrous Membrane for Water Treatment, *ACS Appl. Mater. Interfaces*, 2016, **8**, 6211–6218.
- 6 J. Zhu, J. Wang, A. A. Uliana, M. Tian, Y. Zhang, Y. Zhang, A. Volodin, K. Simoons, S. Yuan, J. Li, J. Lin, K. Bernaerts and B. Van Der Bruggen, Mussel-Inspired Architecture of High-Flux Loose Nanofiltration Membrane Functionalized with Antibacterial Reduced Graphene Oxide-Copper Nanocomposites, *ACS Appl. Mater. Interfaces*, 2017, **9**, 28990–29001.
- 7 Z. Qiu, X. Ji and C. He, Fabrication of a loose nanofiltration candidate from Polyacrylonitrile/Graphene oxide hybrid membrane via thermally induced phase separation, *J. Hazard. Mater.*, 2018, **360**, 122–131.
- 8 G. Abdi, A. Alizadeh, S. Zinadini and G. Moradi, Removal of dye and heavy metal ion using a novel synthetic polyethersulfone nanofiltration membrane modified by magnetic graphene oxide/metformin hybrid, *J. Membr. Sci.*, 2018, **552**, 326–335.
- 9 J. Zhu, N. Guo, Y. Zhang, L. Yu and J. Liu, Preparation and characterization of negatively charged PES nanofiltration membrane by blending with halloysite nanotubes grafted with poly (sodium 4-styrenesulfonate) via surface-initiated ATRP, *J. Membr. Sci.*, 2014, **465**, 91–99.
- 10 S. Yu, M. Liu, M. Ma, M. Qi, Z. Lü and C. Gao, Impacts of membrane properties on reactive dye removal from dye/salt mixtures by asymmetric cellulose acetate and composite polyamide nanofiltration membranes, *J. Membr. Sci.*, 2010, **350**, 83–91.

**Table S5.** BSA adsorption capability, and FRR of the fabricated membranes

| <b>Membrane</b> | <b>BSA adsorption<br/>capability<br/>(<math>\mu\text{g cm}^{-2}</math>)</b> | <b>FRR (%)</b>              |                             |
|-----------------|-----------------------------------------------------------------------------|-----------------------------|-----------------------------|
|                 |                                                                             | <b>2<sup>nd</sup> cycle</b> | <b>3<sup>rd</sup> cycle</b> |
| <b>M0</b>       | 33.9 $\pm$ 3.3                                                              | 88.5                        | 87.9                        |
| <b>M2</b>       | 10.5 $\pm$ 6.1                                                              | 96.4                        | 97.9                        |
